# Supplementary material
Source: Elsevier journal article supplement (https://rcastoragev2.blob.core.windows.net/c2b6a619ea8ba2f00b5abd0d5df59085/mmc1.pdf)
Supplement: mmc1 [file mmc1.pdf]

**Cell Metabolism, Volume 28**

## **Supplemental Information**

### **Perturbed Redox Signaling**

#### **Exacerbates a Mitochondrial Myopathy**

**Sukru Anil Dogan, Raffaele Cerutti, Cristiane Benincá, Gloria Brea-Calvo, Howard Trevor Jacobs, Massimo Zeviani, Marten Szibor, and Carlo Viscomi**

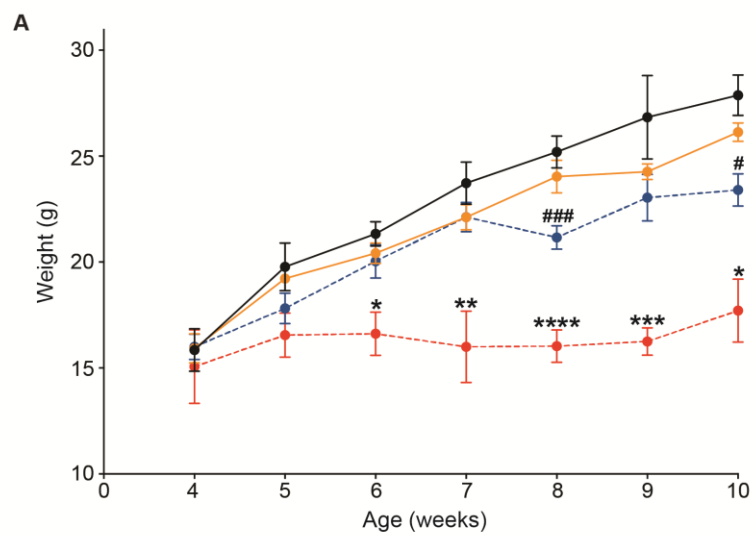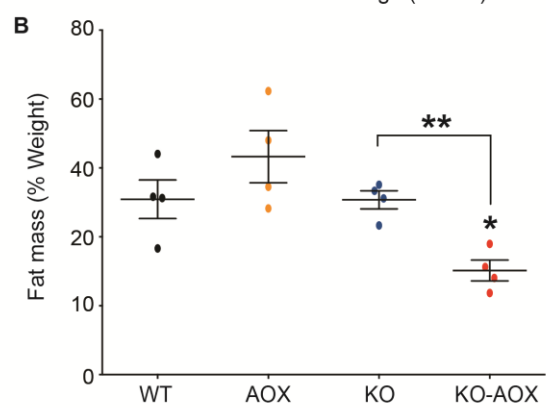

**Figure S1. Related to Figure 1.** KO-AOX is phenotypically worse than KO and control mice.

**(A)** Weight curve for male WT, AOX, KO and KO-AOX mice. Asterisks are used to compare the weight between KO and KO-AOX; the hash keys between WT and KO (n = 13-19). **(B)** Percentage of body fat in 8-week-old animals measured by NMR (n = 4).

Bars represent mean  $\pm$  S.E.M. Asterisks and hash keys over the bars indicate statistical significance vs. WT; over the brackets among indicated groups. (\*p, #p  $\leq$  0.05; \*\*p  $\leq$  0.01; \*\*\*p, ###p  $\leq$  0.001; \*\*\*\*p  $<$  0.0001; unpaired Student's *t*-test).

**A**

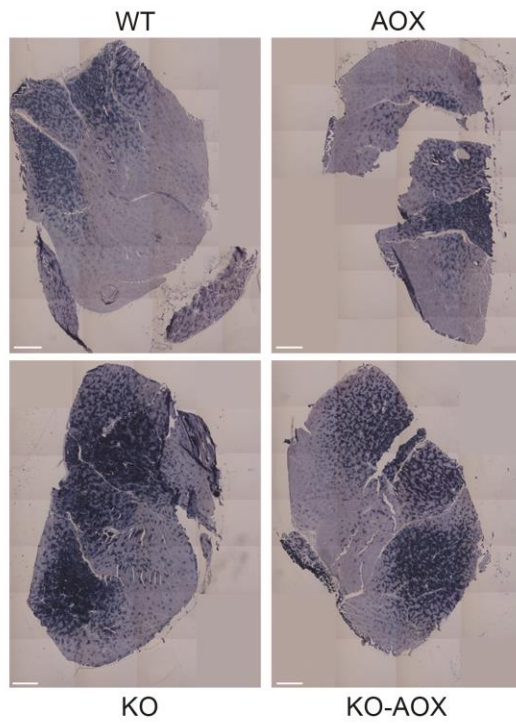

**B**

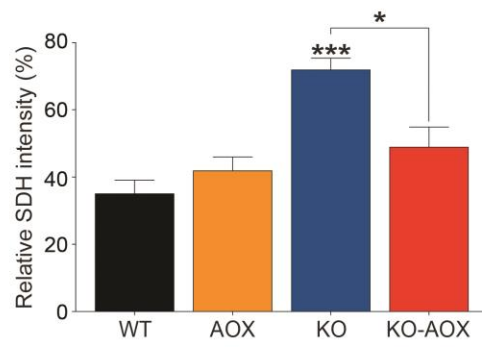

**Figure S2. Related to Figure 2.** SDH activity is increased in KO muscles but returns to WT levels in KO-AOX.

**(A)** Representative gastrocnemius muscle SDH activity micrograph. Whole muscle fiber was stained for SDH activity in 8-week-old WT, AOX, KO and KO-AOX animals (blue). The image represents a randomly chosen image from four samples. Scale bar: 500  $\mu\text{m}$ . **(B)** Quantification of relative SDH intensity (% of total area) (n = 4).

Bars represent mean  $\pm$  S.E.M. Asterisks over the bars indicate statistical significance vs. WT; over the brackets among indicated groups. (\* $p \leq 0.05$ ; \*\*\* $p \leq 0.001$ ; unpaired Student's *t*-test).

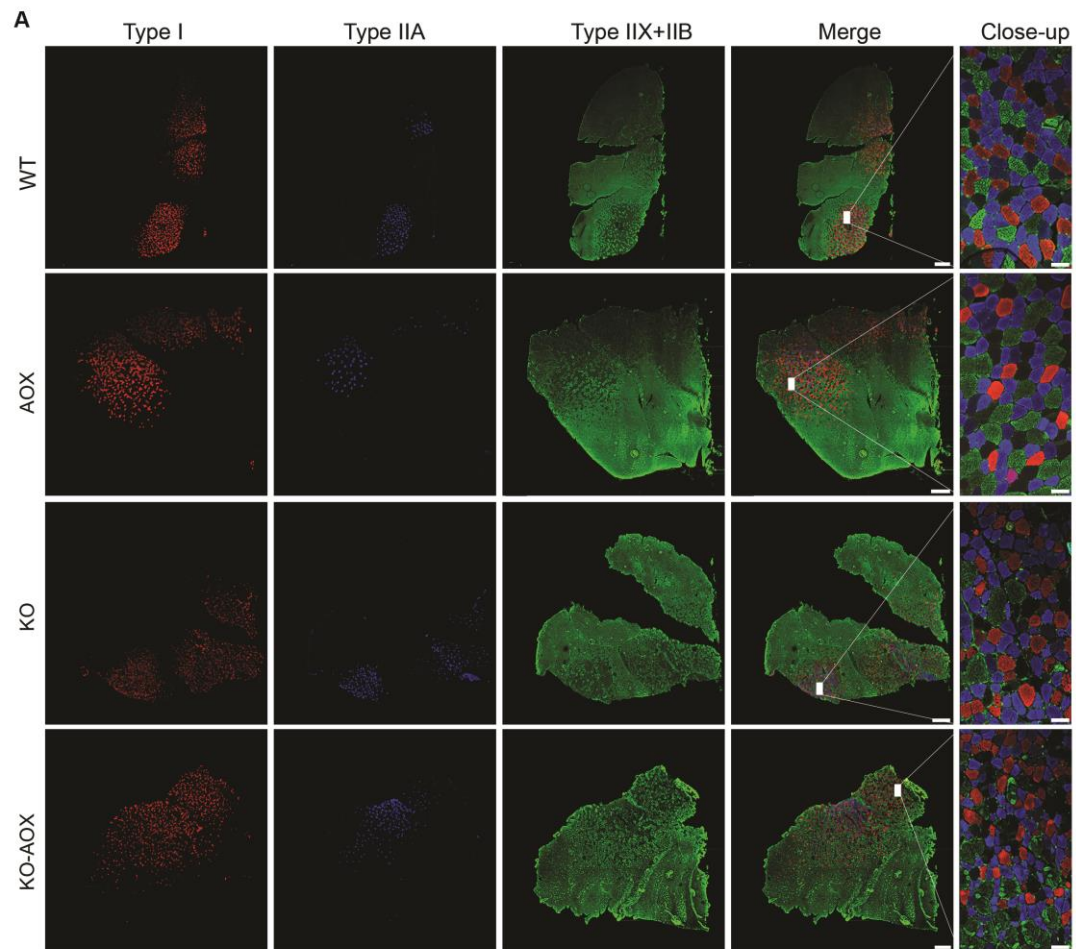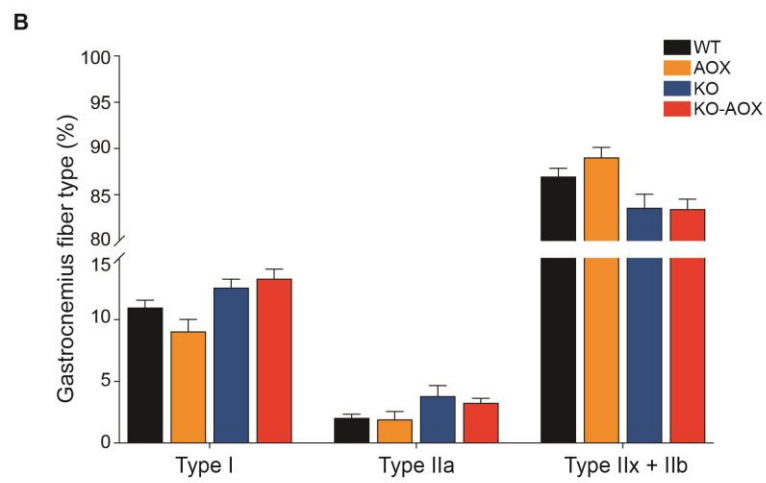

**Figure S3. Related to Figure 3.** No differences were observed in the distribution of muscle fiber types among WT, AOX, KO and KO-AOX animals.

**(A)** Sections of 8-week-old gastrocnemius muscle were immunostained for the different MHCI, MHCIIA and MHCIIIB myosins. Type I (Red), type IIA (Blue), type IIB (Green) and type IIX (unstained) fibers are shown in a whole tissue 3D montage. Scale bars: WT and KO 500  $\mu\text{m}$ , AOX 400  $\mu\text{m}$  and KO-AOX 300  $\mu\text{m}$ . White rectangle highlights the zoomed area (scale bar: 50  $\mu\text{m}$ ). **(B)** Quantification of percentage of each fiber per whole tissue section ( $n = 4$ ).

Bars represent mean  $\pm$  S.E.M.

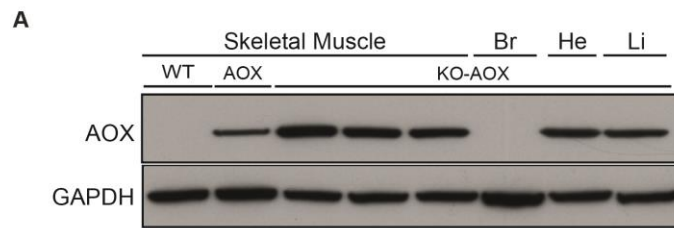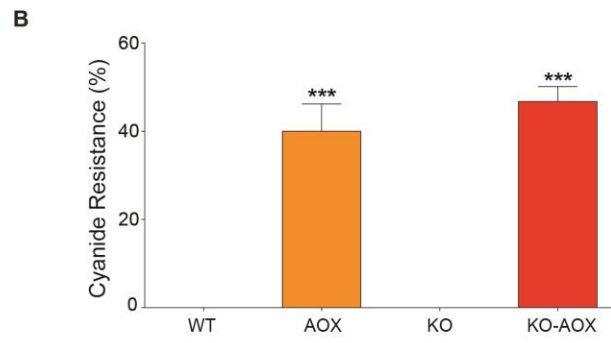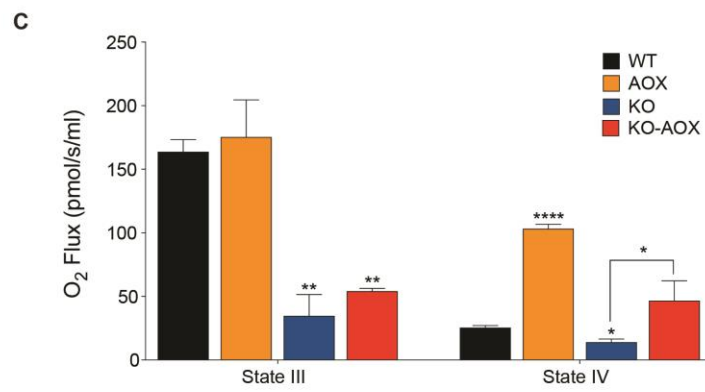



**Figure S4. Related to Figure 4.** AOX is expressed and active in KO-AOX.

(A) Western blot analysis of AOX in skeletal muscle, brain (Br), heart (He) and liver (Li) of WT, AOX and KO-AOX mice. GAPDH is used as loading control. (B) Cyanide resistance in AOX and KO-AOX mice measured by percent of State III (ADP-stimulated) respiration (n=4). (C) Succinate-driven State III (ADP-stimulated) and State IV (oligomycin-sensitive) oxygen consumption rates in isolated skeletal muscle mitochondria (n = 4).

All experiments were done on 8-week-old animals. Bars represent mean  $\pm$  S.E.M. Asterisks directly on top indicate level of statistical significance compared to WT (\*p  $\leq$  0.05; \*\*p  $\leq$  0.01; \*\*\*p  $\leq$  0.001; \*\*\*\*p < 0.0001; unpaired Student's *t*-test).

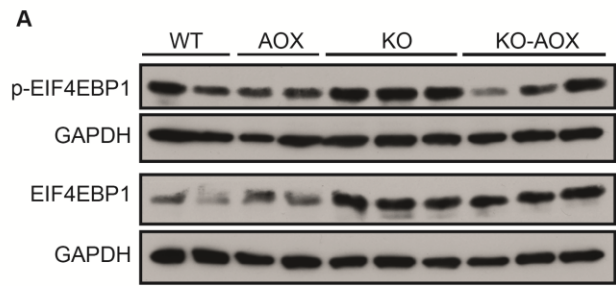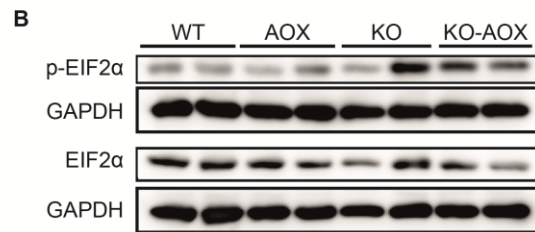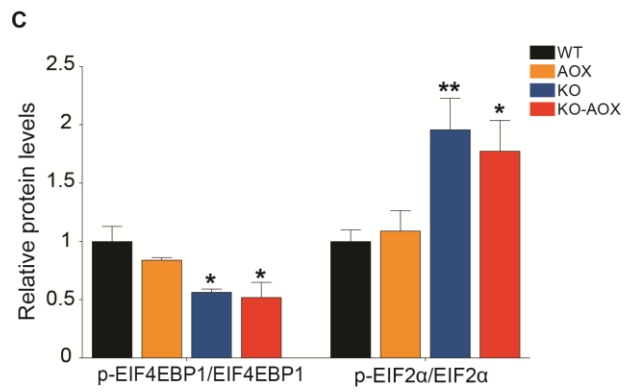

**Figure S5. Related to Figure 6.** Both KO and KO-AOX show increased levels of EIF-2alpha (EIF2 $\alpha$ ) and decreased mTOR signaling.

Western blots of **(A)** phosphorylated- and total EIF4EBP1; and **(B)** phosphorylated- and total EIF2 $\alpha$ . **(C)** Quantification (n = 5) of aforementioned proteins in WT, AOX, KO and KO-AOX mice.

Western blots were performed on skeletal muscle homogenates of 8-week-old mice. GAPDH is used as loading control. Bars represent mean  $\pm$  S.E.M. Asterisks over the bars indicate statistical significance vs. WT; over the brackets among indicated groups. (\*p  $\leq$  0.05; \*\*p  $\leq$  0.01; unpaired Student's *t*-test).

**Table S1. Related to Star Methods.** qPCR primer sequences.

|                 | Forward 5' - 3'          | Reverse 5' - 3'           |
|-----------------|--------------------------|---------------------------|
| <i>Afg3l2</i>   | GTTGATGGGCAATACGTCTGG    | GACCCGGTTCTCCCCTTCT       |
| <i>Aldh18a1</i> | AATCAGGGCCGAGAGATGATG    | GGCCTCTAAGACCGGAATTGC     |
| <i>Atf3</i>     | CCAGAATAAACACCTCTGCCATCG | CTTCAGCTCAGCA TTCACACTCTC |
| <i>Atf4</i>     | GCAAGGAGGATGCCTTTTC      | GTTTCCAGGTCATCCATTCTG     |
| <i>Atf5</i>     | CCTTGCCCTTGCCACCTTTGAC   | CCAGAGGAGGAGGCTGCTGT      |
| <i>Atf6</i>     | TCGCCTTTTAGTCCGGTTCTT    | GGCTCCATAGGTCTGACTCC      |
| <i>Catalase</i> | TGGCACACTTTGACAGAGAGC    | CCTTTGCCTTGGAGTATCTGG     |
| <i>Chop</i>     | CTGGAAGCCTGGTATGAGGAT    | CAGGGTCAAGAGTAGTGAAGGT    |
| <i>CoxI</i>     | TGCTAGCCGCAGGCATTACT     | CGGGATCAAAGAAAGTTGTGTTT   |
| <i>CoxII</i>    | CAGGCCGACTAAATCAAGCAA    | GAGCATTGGCCATAGAATAATCCT  |
| <i>CoxVa</i>    | TCATCCAGGAACTTAGACCAACT  | AGTCCTTAGGAAGCCCATCG      |
| <i>Gpx1</i>     | CCACCGTGTATGCCTTCTCC     | AGAGAGACGCGACATTCTCAAT    |
| <i>Hprt</i>     | TCCTCCTCAGACCGCTTTT      | CCTGGTTCATCATCGCTAAT      |
| <i>mtHsp70</i>  | ATGGCTGGAATGGCCTTAGC     | ACCCAAATCAATACCAACCACTG   |
| <i>Ndufs8</i>   | CTTCGGCTTTGTGGCTTTCATGGT | AAAGCCCATCAAGCCTCCTCAGAT  |
| <i>Nfe2l2</i>   | TCCATTCCCGAATTACAGTGTCT  | GCCCACTTCTTTTTCCAGCG      |
| <i>Pycr1</i>    | ATGAGCGTAGGCTTCATCGG     | GTGTCAGGTTACCCCTATCT      |
| <i>RNaseP</i>   | GCCTACACTGGAGTCCGTGCTACT | CTGACCACACACGAGCTGGTAGAA  |
| <i>Sdhb</i>     | GACGTCAGGAGCCAAAATGG     | CTCGACAGGCCTGAAACTGC      |
| <i>Sod1</i>     | CAAGCGGTGAACCAGTTGTG     | TGAGGTCCTGCACTGGTAC       |
| <i>Sod2</i>     | GCCTGCACTGAAGTTCAATG     | ATCTGTAAGCGACCTTGCTC      |
| <i>Uqcrrf1</i>  | ATCCCTGAAGGGAAGAACATGGCT | TGCAGCTTCCTGGTCAATCTCCTT  |
